# Supplementary material for: La amortización de los vales reales con fondos procedentes de los Obispados Vacantes de España a fianales del Siglo XVIII y principios del Siglo XIX
Source: Springer Nature journal article supplement (doi:10.1186/s13075-017-1254-8), 2001-01-01
Supplement: MOESM1 [file 12127088]

**Additional File 1. Full *SLC2A9* and *ABCG2* genotype distributions according to tophus status.**

| <b>Allele (A1/A2)</b>                         |            | <b>Genotype</b> |             |             |
|-----------------------------------------------|------------|-----------------|-------------|-------------|
| <b><i>SLC2A9 rs11942223</i></b>               | <b>T/C</b> | <b>T/T</b>      | <b>T/C</b>  | <b>C/C</b>  |
| All, no tophi (n=1151)                        |            | 947 (82.2%)     | 189 (16.4%) | 15 (1.3%)   |
| All, tophi (n=627)                            |            | 533 (85.0%)     | 89 (14.2%)  | 5 (0.8%)    |
| Non-Polynesian ancestry, no tophi (n=639)     |            | 471 (73.7%)     | 155 (24.3%) | 13 (2.0%)   |
| Non-Polynesian ancestry, tophi (n=288)        |            | 219 (76.0%)     | 66 (22.9%)  | 3 (1.0%)    |
| Māori or Pacific ancestry, no tophi (n=512)   |            | 476 (93.0%)     | 34 (6.6%)   | 2 (0.4%)    |
| Māori or Pacific ancestry, tophi (n=339)      |            | 314 (92.6%)     | 23 (6.8%)   | 2 (0.6%)    |
| Eastern Polynesian ancestry, no tophi (n=291) |            | 267 (91.8%)     | 23 (7.0%)   | 1 (0.3%)    |
| Eastern Polynesian ancestry, tophi (n=173)    |            | 156 (90.2%)     | 15 (8.7%)   | 2 (1.2%)    |
| Western Polynesian ancestry, no tophi (n=221) |            | 209 (94.6%)     | 11 (5.0%)   | 1 (0.5%)    |
| Western Polynesian ancestry, tophi (n=166)    |            | 158 (95.2%)     | 8 (4.8%)    | 0 (0%)      |
| <b><i>ABCG2 rs2231142</i></b>                 | <b>G/T</b> | <b>G/G</b>      | <b>G/T</b>  | <b>T/T</b>  |
| All, no tophi (n=1151)                        |            | 668 (58.0%)     | 393 (34.1%) | 90 (7.8%)   |
| All, tophi (n=627)                            |            | 331 (52.8%)     | 228 (36.4%) | 68 (10.8%)  |
| Non-Polynesian ancestry, no tophi (n=639)     |            | 376 (59.3%)     | 222 (34.7%) | 41 (6.4%)   |
| Non-Polynesian ancestry, tophi (n=288)        |            | 172 (75.4%)     | 94 (32.6%)  | 22 (7.6%)   |
| Māori or Pacific ancestry, no tophi (n=512)   |            | 292 (57.0%)     | 171 (33.4%) | 49 (9.5%)   |
| Māori or Pacific ancestry, tophi (n=339)      |            | 159 (46.9%)     | 134 (39.5%) | 46 (13.6%)  |
| Eastern Polynesian ancestry, no tophi (n=291) |            | 221 (75.9%)     | 68 (23.4%)  | 2 (0.7%)    |
| Eastern Polynesian ancestry, tophi (n=173)    |            | 123 (71.1%)     | 45 (26.0%)  | 5 (2.9%)    |
| Western Polynesian ancestry, no tophi (n=221) |            | 71 (32.1%)      | 103 (46.6%) | 47 (21.2%)  |
| Western Polynesian ancestry, tophi (n=166)    |            | 36 (21.7%)      | 89 (53.6%)  | 41 (24.7%)  |
| <b><i>ABCG2 rs10011796</i></b>                | <b>T/C</b> | <b>TT</b>       | <b>CT</b>   | <b>CC</b>   |
| All, no tophi (n=1122)                        |            | 408 (36.4%)     | 509 (45.3%) | 205 (18.3%) |
| All, tophi (n=618)                            |            | 236 (38.2%)     | 293 (47.4%) | 89 (14.4%)  |
| Non-Polynesian ancestry, no tophi (n=621)     |            | 205 (33.0%)     | 285 (45.9%) | 131 (21.1%) |
| Non-Polynesian ancestry, tophi (n=283)        |            | 101 (35.7%)     | 129 (45.6%) | 53 (18.7%)  |
| Māori or Pacific ancestry, no tophi (n=501)   |            | 203 (40.5%)     | 224 (44.7%) | 74 (14.8%)  |
| Māori or Pacific ancestry, tophi (n=335)      |            | 135 (40.3%)     | 164 (49.0%) | 36 (10.7%)  |
| Eastern Polynesian ancestry, no tophi (n=285) |            | 107 (37.5%)     | 135 (47.4%) | 43 (15.1%)  |
| Eastern Polynesian ancestry, tophi (n=171)    |            | 55 (32.2%)      | 87 (50.9%)  | 29 (17.0%)  |
| Western Polynesian ancestry, no tophi (n=216) |            | 96 (44.4%)      | 89 (41.2%)  | 31 (14.4%)  |
| Western Polynesian ancestry, tophi (n=164)    |            | 80 (48.8%)      | 77 (47.0%)  | 7 (4.2%)    |
